# Supplementary material
Source: Springer Nature journal article supplement (https://www.springermedizin.de/resource/supplementary/12957_2013_1535_MOESM4_ESM.pdf/9563530)

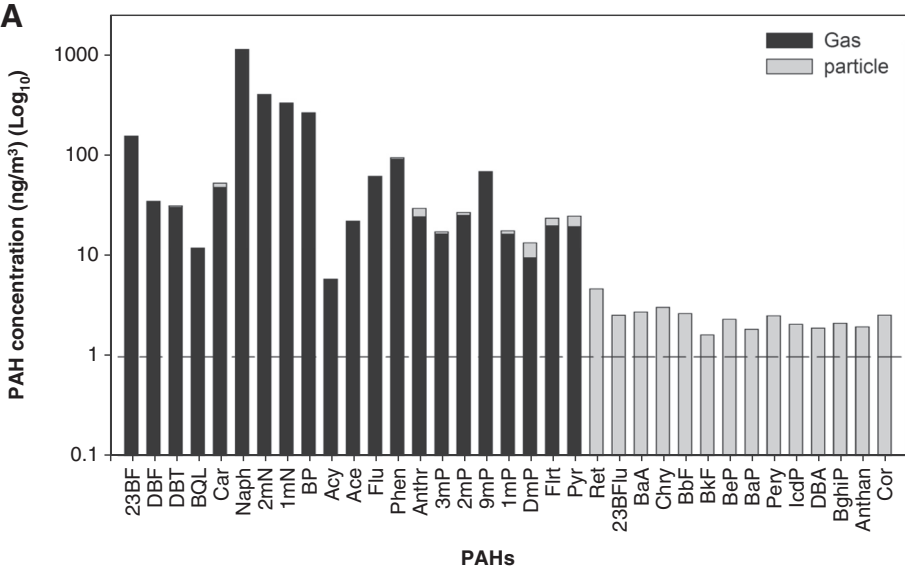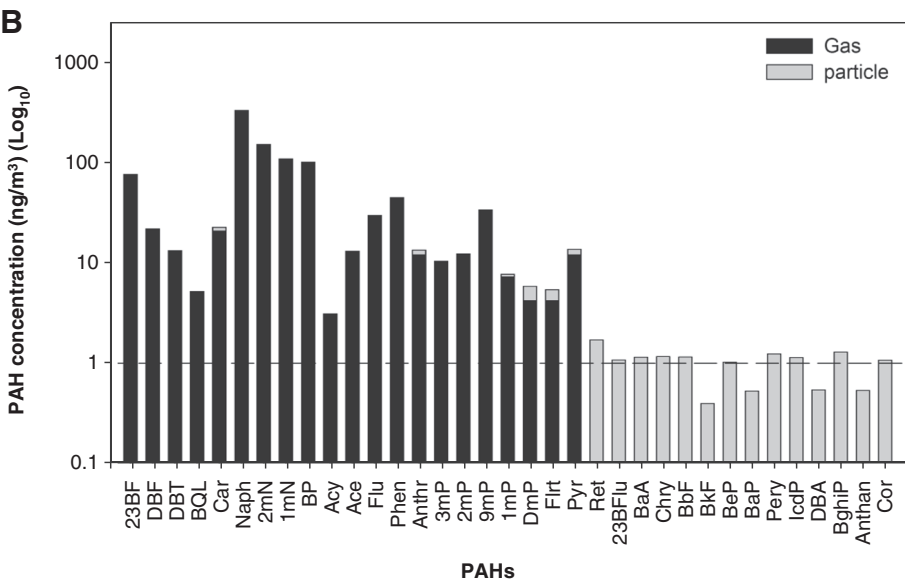

Supplement: MOESM4 [file 9563530]
